# Supplementary material
Source: publisher site journal article supplement (https://www.dovepress.com/article/456353)

**Cucurbitacin E alleviated colonic barrier function impairment and inflammation response and improved microbial composition on experimental colitis models**

Fengxia Zhan1, Wei Song2, Yong Fan3, Fangjian Wang1, Qian Wang4,5*

[1Department of Clinical Laboratory](http://www-zhizhen-com-s.vpn.fio.com.cn:8118/s?sw=authorcompy%28%3Csup%3Ea%3C%2Fsup%3EDepartment+of+Clinical+Laboratory%29), [Hospital of Shandong University](http://www-zhizhen-com-s.vpn.fio.com.cn:8118/s?sw=authorcompy%28Hospital+of+Shandong+University%29), [Jinan](http://www-zhizhen-com-s.vpn.fio.com.cn:8118/s?sw=authorcompy%28Jinan%29), [250100](http://www-zhizhen-com-s.vpn.fio.com.cn:8118/s?sw=authorcompy%28Shandong%29), [China](http://www-zhizhen-com-s.vpn.fio.com.cn:8118/s?sw=authorcompy%28China%29)

2Key Laboratory of Marine Eco-Environmental Science and Technology, First Institute of Oceanography, Ministry of Natural Resources, Qingdao, 266061, China

3Qingdao Mental Health Center, Qingdao University, Qingdao, China

[4Department of Clinical Laboratory](http://www-zhizhen-com-s.vpn.fio.com.cn:8118/s?sw=authorcompy%28%3Csup%3Ed%3C%2Fsup%3EDepartment+of+Clinical+Laboratory%29), [Qilu Hospital](http://www-zhizhen-com-s.vpn.fio.com.cn:8118/s?sw=authorcompy%28Qilu+Hospital%29), [Shandong University](http://www-zhizhen-com-s.vpn.fio.com.cn:8118/s?sw=authorcompy%28Shandong+University%29), [Jinan](http://www-zhizhen-com-s.vpn.fio.com.cn:8118/s?sw=authorcompy%28Jinan%29), 250012, [China](http://www-zhizhen-com-s.vpn.fio.com.cn:8118/s?sw=authorcompy%28China%29)

[5Department of Clinical Laboratory](http://www-zhizhen-com-s.vpn.fio.com.cn:8118/s?sw=authorcompy%28%3Csup%3Ed%3C%2Fsup%3EDepartment+of+Clinical+Laboratory%29), [Qilu Hospital](http://www-zhizhen-com-s.vpn.fio.com.cn:8118/s?sw=authorcompy%28Qilu+Hospital%29) (Qingdao), [Shandong University](http://www-zhizhen-com-s.vpn.fio.com.cn:8118/s?sw=authorcompy%28Shandong+University%29), [Qingdao](http://www-zhizhen-com-s.vpn.fio.com.cn:8118/s?sw=authorcompy%28Jinan%29), 266035, [China](http://www-zhizhen-com-s.vpn.fio.com.cn:8118/s?sw=authorcompy%28China%29)

*Correspondence: Qian Wang, wq028038@qlyyqd.com

**Table S1 Assessment of disease activity**

The disease activity index (DAI) based on body weight change, stool consistency and rectal bleeding, of the animal during the experiment was calculated according to a standard scoring system.

| Scores | Body weight change | Stool consistency | Rectal bleeding |
| --- | --- | --- | --- |
| 0 | No weight loss | Normal | Negative hemoccult |
| 1 | Weight loss of 0.1-5% | Soft but still formed | Positive hemoccult |
| 2 | Weight loss of 5-10% | Very soft | Blood traces in stool visible |
| 3 | Weight loss >10% | Diarrhea | Rectal bleeding |

**Table S2 Primers for quantification of gene expression by qPCR**

| Gene | 5’-3’ Primer sequence |
| --- | --- |
| *Il-6* | F: CCTCTCTGCAAGAGACTTCCAT | |
| R: AGTCTCCTCTCCGGACTTGT | |
| *Tnf-α* | F: ATGAGAAGTTCCCAAATGGC | |
| R: CTCCACTTGGTGGTTTGCTA | |
| *Il-8* | F: CTAGGCATCTTCGTCCGTCC | |
| R: CAGAAGCTTCATTGCCGGTG | |
| *Muc1* | F: CCAAGCGTAGCCCCTATGAG | |
| R: GTGGGGTGACTTGCTCCTAC | |
| *Muc2* | F: GCCCACCTCACAAGCAGTAT | |
| R: GTCATAGCCAGGGGCAAACT | |
| *Tjp-1* | F: GAGCAGGCTTTGGAGGAGAC | |
| R: TGGGACAAAAGTCCGGGAAG | |
| *Occludin* | F: TATGACCCCTTGACCCCCAT | |
| R: AGAGGTTGTTTTCCGGGGAC | |
| *Claudin-1* | F: GTGAATGGGTCACCGAGGGA | |
| R: GAGCAAAATGTCCAGGCTCC | |
| *β-actin* | F: TGTCCACCTTCCAGCAGATGT | |
| R: AGCTCAGTAACAGTCCGCCTAGA | |

**Figure S1 Differentially expressed genes in the treatment groups**


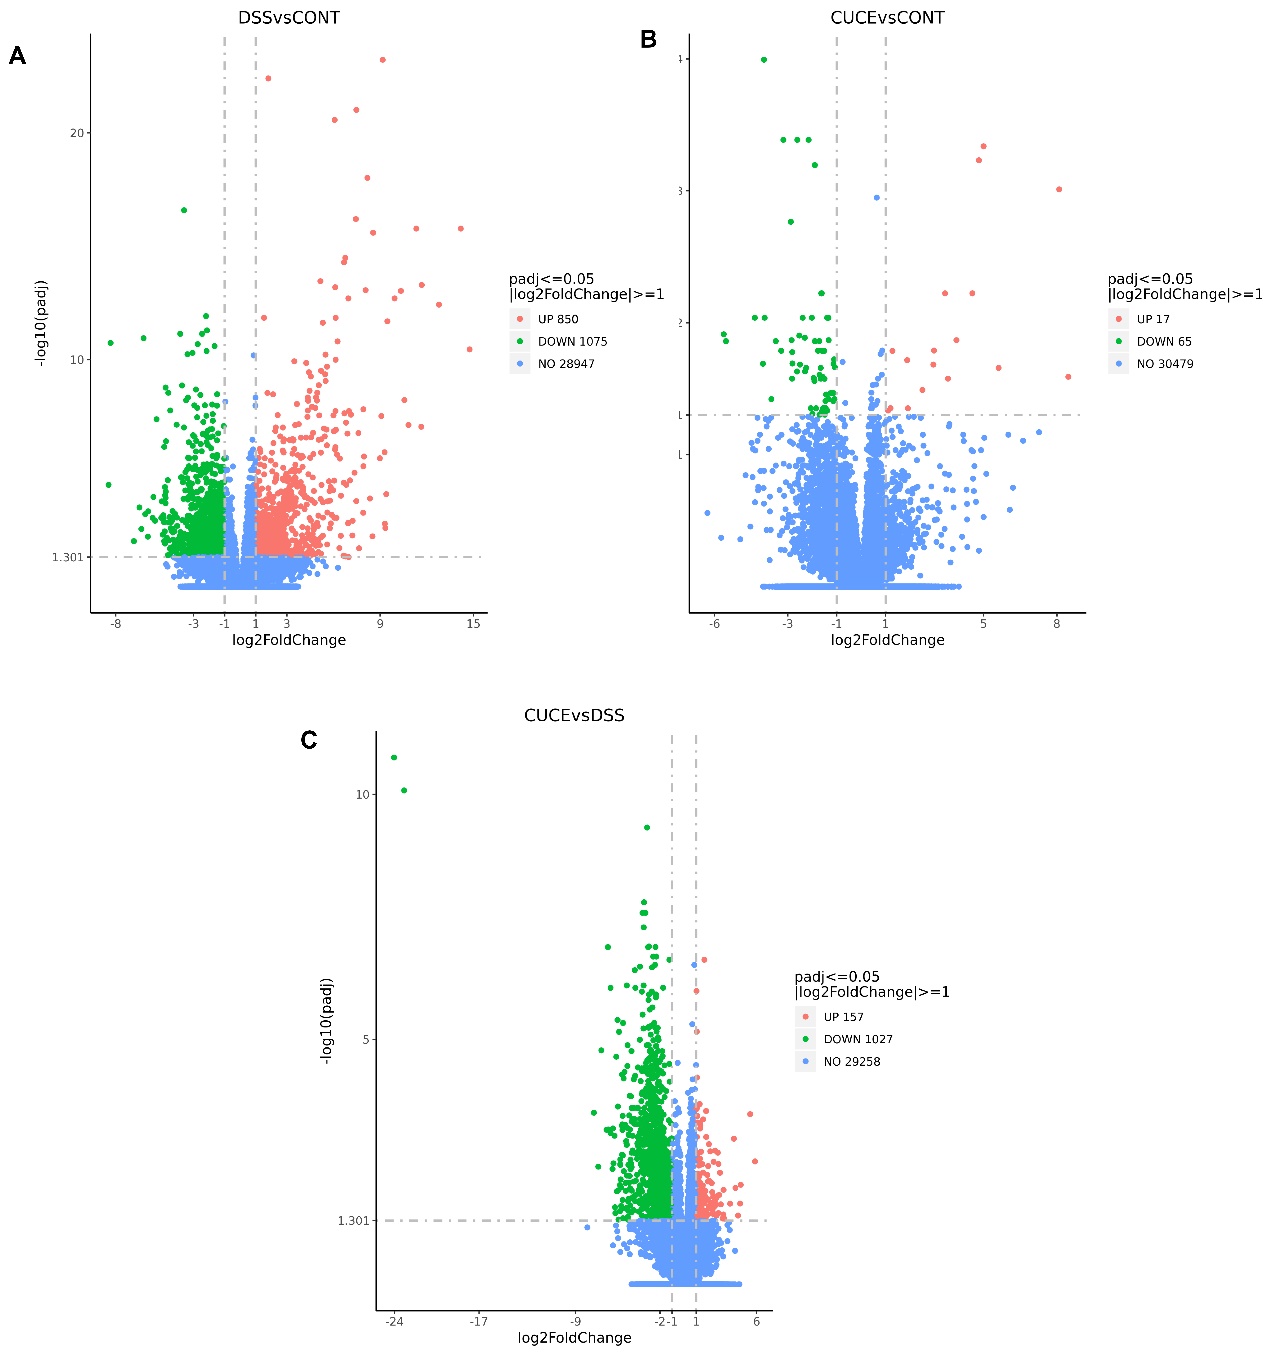

Supplement: Supplementary file 1 [file get_supplementary_file.php]
